# Supplementary material for: Examining Patterns of Psychotherapy Service Utilization Among Medicaid-Enrolled Adolescents
Source: Atypon-hosted journal article supplement (doi:10.1176/appi.ps.202100513), 2023-01-04
Supplement: appi.ps.202100513.ds001.pdf [file appi.ps.202100513.ds001.pdf]

**SUPPLEMENTAL TABLE 1. Procedure Codes Used for Outpatient Visits**

| <b>Procedure Code</b> | <b>Description</b>                                                                                                      |
|-----------------------|-------------------------------------------------------------------------------------------------------------------------|
| 90791                 | Psychiatric diagnostic interview examination                                                                            |
| 90801                 | Major Psychotherapy Revisions                                                                                           |
| 90804                 | Initial Evaluation and Psychotherapy                                                                                    |
| 90805                 | Individual Psychotherapy                                                                                                |
| 90806                 | Initial Evaluation and Psychotherapy                                                                                    |
| 90807                 | Individual Psychotherapy                                                                                                |
| 90808                 | Individual Psychotherapy                                                                                                |
| 90812                 | Individual Psychotherapy                                                                                                |
| 90832                 | Psychotherapy Services and Procedures                                                                                   |
| 90833                 | Thirty minutes of individual psychotherapy performed with an E/M service                                                |
| 90834                 | Psychotherapy Services and Procedures                                                                                   |
| 90836                 | Forty-five minutes of individual psychotherapy performed with an E/M service                                            |
| 90837                 | Psychotherapy, 60 minutes with patient                                                                                  |
| 90838                 | Sixty minutes of individual psychotherapy performed with an E/M service                                                 |
| 90839                 | Crisis psychotherapy session requiring urgent assessment and history of the crisis state, mental status and disposition |
| 90840                 | Patient in crisis add-on—Each additional 30 minutes                                                                     |
| 90845                 | Other psychotherapy procedures, such as Psychoanalysis                                                                  |
| 90846                 | Family psychotherapy sessions                                                                                           |
| 90847                 | Family psychotherapy                                                                                                    |
| 90849                 | Multiple-family group psychotherapy                                                                                     |
| 99600                 | Home Health Procedures                                                                                                  |
| H0004                 | BEHAVIORAL HEALTH counseling and therapy                                                                                |
| H0005                 | Alcohol and/or drug services; group counseling by a clinician                                                           |
| H0015                 | Alcohol and/or drug services; intensive outpatient                                                                      |
| H0046                 | Mental health services, not otherwise specified                                                                         |
| H2011                 | Crisis intervention service                                                                                             |
| H2019                 | Therapeutic behavioral services                                                                                         |
| H2020                 | Therapeutic behavioral services, per diem                                                                               |
| H2032                 | Activity therapy                                                                                                        |
| H2035                 | Alcohol and/or other drug treatment program, per hour                                                                   |
